# Supplementary material for: Cost-effectiveness of ovarian stimulation agents for IUI in couples with unexplained subfertility
Source: PubMed Central journal article supplement — Hum Reprod. 2021 Feb 22;36(5):1288–95. doi: 10.1093/humrep/deab013 (PMC8366296; doi:10.1093/humrep/deab013), 2021-02-22
Supplement: deab013_Supplementary_FigureS2.pdf [file deab013_Supplementary_FigureS2.pdf]

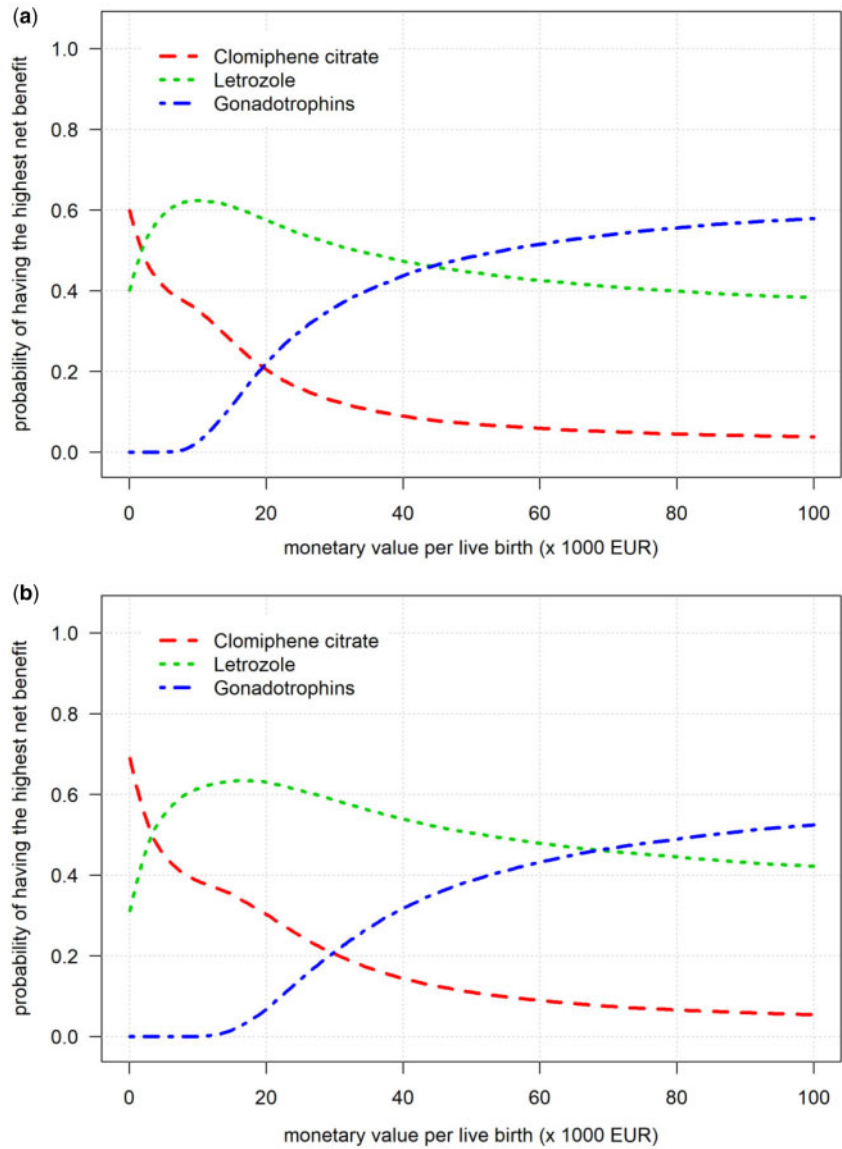

Supplementary Figure S2. Net benefit curves for all agents for different average number of cycles. (a) Two cycles on average; (b) six cycles on average.
