# Supplementary material for: Cost-effectiveness of ovarian stimulation agents for IUI in couples with unexplained subfertility
Source: PubMed Central journal article supplement — Hum Reprod. 2021 Feb 22;36(5):1288–95. doi: 10.1093/humrep/deab013 (PMC8366296; doi:10.1093/humrep/deab013), 2021-02-22
Supplement: deab013_Supplementary_FigureS3.pdf [file deab013_Supplementary_FigureS3.pdf]

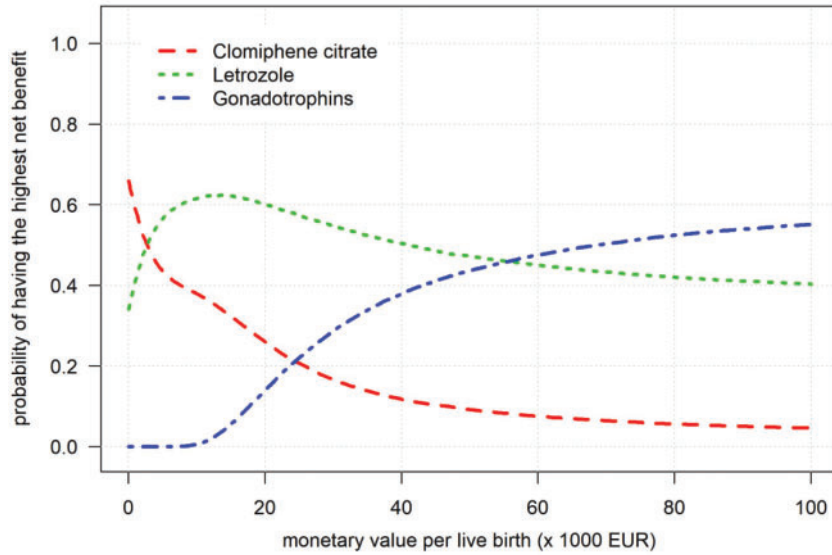

**Supplementary Figure S3.** Net benefit curves for all agents (using cumulative live birth rate from trials up to four cycles adhering to strict cancellation criteria).
