# Supplementary material for: Cost-effectiveness of ovarian stimulation agents for IUI in couples with unexplained subfertility
Source: PubMed Central journal article supplement — Hum Reprod. 2021 Feb 22;36(5):1288–95. doi: 10.1093/humrep/deab013 (PMC8366296; doi:10.1093/humrep/deab013), 2021-02-22
Supplement: deab013_Supplementary_TableS1.pdf [file deab013_Supplementary_TableS1.pdf]

**Supplementary Table S1** Main outcomes from the cost-effectiveness analysis (with the relative risk for gonadotrophins versus clomiphene citrate derived from all trials).

| Agent              | Cumulative probability of live birth over four cycles % | Average costs (€) | Probability of multiple pregnancy % | Incremental cost-effectiveness ratio (€) (ICER) |
|--------------------|---------------------------------------------------------|-------------------|-------------------------------------|-------------------------------------------------|
| Clomiphene citrate | 29.5                                                    | 362               | 2.5                                 | 0 (reference)                                   |
| Letrozole          | 32.0                                                    | 434               | 3.0                                 | 2787 (95% CI:<br>–42 113 to 43 417)             |
| Gonadotrophins     | 39.1                                                    | 1809              | 5.3                                 | 19 448 (95% CI:<br>–164 224 to 204 468)         |

All costs in €EUR.
