# Supplementary material for: Cost-effectiveness of ovarian stimulation agents for IUI in couples with unexplained subfertility
Source: PubMed Central journal article supplement — Hum Reprod. 2021 Feb 22;36(5):1288–95. doi: 10.1093/humrep/deab013 (PMC8366296; doi:10.1093/humrep/deab013), 2021-02-22
Supplement: deab013_Supplementary_TableS2.pdf [file deab013_Supplementary_TableS2.pdf]

**Supplementary Table SII** Main outcomes from the cost-effectiveness analysis (over 2 cycles on average).

| Agent              | Cumulative probability of live birth over 2 cycles % | Average costs (€) | Probability of multiple pregnancy % | Incremental cost-effectiveness ratio (€) (ICER) |
|--------------------|------------------------------------------------------|-------------------|-------------------------------------|-------------------------------------------------|
| Clomiphene citrate | 16.0                                                 | 182               | 1.3                                 | 0 (reference)                                   |
| Letrozole          | 17.6                                                 | 218               | 1.5                                 | 2208 (95% CI: -44 640 to 48 466)                |
| Gonadotrophins     | 19.2                                                 | 903               | 2.6                                 | 44 746 (95% CI: -251 176 to 243 119)            |

All costs in €EUR.
