# Supplementary material for: Cost-effectiveness of ovarian stimulation agents for IUI in couples with unexplained subfertility
Source: PubMed Central journal article supplement — Hum Reprod. 2021 Feb 22;36(5):1288–95. doi: 10.1093/humrep/deab013 (PMC8366296; doi:10.1093/humrep/deab013), 2021-02-22
Supplement: deab013_Supplementary_TableS3.pdf [file deab013_Supplementary_TableS3.pdf]

**Supplementary Table SIII** Main outcomes from the cost-effectiveness analysis (over 6 cycles on average).

| Agent              | Cumulative probability of live birth over six cycles % | Average costs (€) | Probability of multiple pregnancy % | Incremental cost-effectiveness ratio (€) (ICER) |
|--------------------|--------------------------------------------------------|-------------------|-------------------------------------|-------------------------------------------------|
| Clomiphene citrate | 40.7                                                   | 544               | 3.8                                 | 0 (reference)                                   |
| Letrozole          | 43.9                                                   | 650               | 4.5                                 | 3332 (95% CI:<br>–40 809 to 41 380)             |
| Gonadotrophins     | 46.9                                                   | 2714              | 8.0                                 | 67 376 (95% CI:<br>–386 836 to 398 976)         |

All costs in €EUR.
