# Supplementary material for: Cost-effectiveness of ovarian stimulation agents for IUI in couples with unexplained subfertility
Source: PubMed Central journal article supplement — Hum Reprod. 2021 Feb 22;36(5):1288–95. doi: 10.1093/humrep/deab013 (PMC8366296; doi:10.1093/humrep/deab013), 2021-02-22
Supplement: deab013_Supplementary_TableS4.pdf [file deab013_Supplementary_TableS4.pdf]

**Supplementary Table SIV** Main outcomes from the cost-effectiveness analysis (using cumulative live birth rate from trials up to 4 cycles adhering to strict cancellation criteria).

| Agent              | Cumulative probability of live birth over four cycles % | Average costs (€) | Probability of multiple pregnancy % | Incremental cost-effectiveness ratio (€) (ICER) |
|--------------------|---------------------------------------------------------|-------------------|-------------------------------------|-------------------------------------------------|
| Clomiphene citrate | 24.6                                                    | 363               | 2.5                                 | 0 (reference)                                   |
| Letrozole          | 27.3                                                    | 435               | 3.0                                 | 2717 (95% CI:<br>–44 206 to 41 223)             |
| Gonadotrophins     | 29.7                                                    | 1808              | 5.3                                 | 56 773 (95% CI:<br>–315 222 to 303 353)         |

All costs in €EUR.
