# Supplementary material for: Cost-effectiveness of ovarian stimulation agents for IUI in couples with unexplained subfertility
Source: PubMed Central journal article supplement — Hum Reprod. 2021 Feb 22;36(5):1288–95. doi: 10.1093/humrep/deab013 (PMC8366296; doi:10.1093/humrep/deab013), 2021-02-22
Supplement: deab013_Supplementary_TableS5.pdf [file deab013_Supplementary_TableS5.pdf]

**Supplementary Table SV** Main outcomes from the cost-effectiveness analysis (using parameters from the individual patient data analysis).

| Agent              | Cumulative probability of live birth over four cycles % | Average costs (€) | Probability of multiple pregnancy % | Incremental cost-effectiveness ratio (€) (ICER) |
|--------------------|---------------------------------------------------------|-------------------|-------------------------------------|-------------------------------------------------|
| Letrozole          | 24.6                                                    | 434               | 3.0                                 | 0 (reference)                                   |
| Clomiphene citrate | 29.7                                                    | 362               | 2.5                                 | –1408 (95% CI:<br>–22 686 to 18 605)            |
| Gonadotrophins     | 36.8                                                    | 1808              | 5.3                                 | 20 506 (95% CI:<br>10 228 to 84 756)            |

All costs in €EUR.
